# Supplementary material
Source: publisher figshare collection journal article supplement (https://frontiersin.figshare.com/ndownloader/files/34716631)
Supplement: Supplementary file 1 [file 34716631]

Supplementary Material

# Supplementary Methods

**Table SI.1. Energy ranges, step sizes, and dwell times for STXM data collection.** Data for the collection of sulfur L-edge and carbon K-edge x-ray images are presented. Data were collected with differing step sizes such that finer steps were taken over the key regions of interest while larger step sizes were used on the lowest and highest energies (thus baseline data were available in the regions where step sizes could be larger).

| **Sulfur L-Edge Data Collection** | | | | | |
| --- | --- | --- | --- | --- | --- |
| **Start Energy (eV)** | **End Energy (eV)** | **Range  (eV)** | **Step Size  (eV)** | **# Points** | **Dwell Time (s)** |
| 155 | 161 | 6 | 0.375 | 17 | 0.897 |
| 161.2 | 185 | 23.8 | 0.15 | 160 | 0.897 |
| 185.2 | 190 | 4.8 | 0.6 | 9 | 0.897 |
| **Carbon K-Edge Data Collection** | | | | | |
| **Start Energy (eV)** | **End Energy (eV)** | **Range  (eV)** | **Step Size  (eV)** | **# Points** | **Dwell Time (s)** |
| 260 | 280 | 20 | 2 | 11 | 1.225 |
| 280 | 283 | 3 | 0.375 | 9 | 1.225 |
| 283 | 293 | 10 | 0.114 | 89 | 1.225 |
| 293 | 310 | 17 | 0.304 | 57 | 1.225 |
| 310 | 320 | 10 | 0.909 | 12 | 1.225 |
| 320 | 340 | 20 | 10 | 3 | 1.225 |

# Supplementary Figures

## Supplementary Images


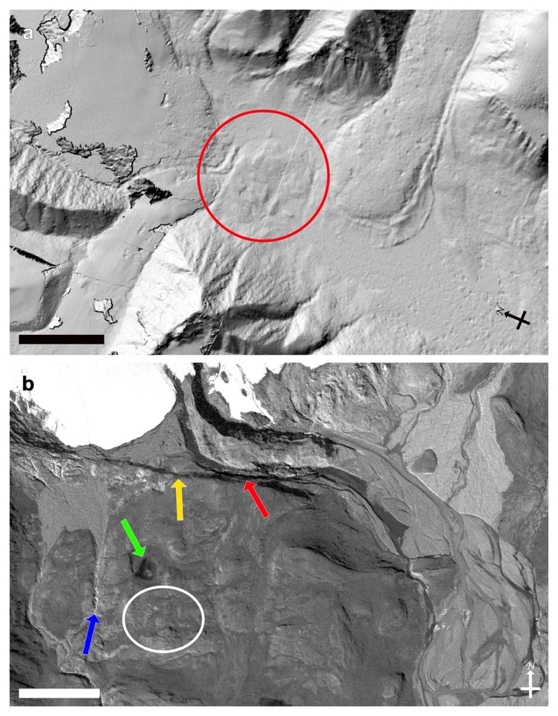

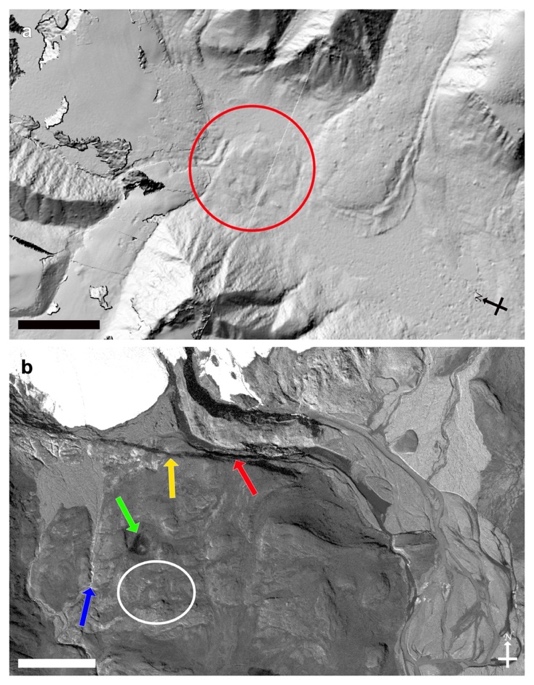


**Supplementary Figure SI.1.** The region bearing the alteration features is topographically high compared to the surrounding valley floor, as shown in **a**, where a hillshade digital elevation model shows this topography (red circle highlights the region of the alteration features). The hill can also be observed in **b**, which shows a digital elevation model (DEM) of the valley of Borup Fiord Pass in hillshade, as processed by ArcticDEM. The white circle shows roughly the region of the lateration features. Arrows show the location of the best exposure of the strike-slip fault within the central region of the valley (red), the location of sample NF (yellow), a lake where multiple red stained rocks were observed (green), and the region of a canyon that cuts along the side of the hill (blue; pyrite was observed in veins within carbonate rock in this canyon cut). The DEM was created from DigitalGlobe, Inc., imagery and funded under National Science Foundation awards 1043681, 1559691, and 1542736, by Arctic DEM (http://www.pgc.umn.edu/arcticdem). Scale bars are 1 km in **a** and 200 m in **b**.


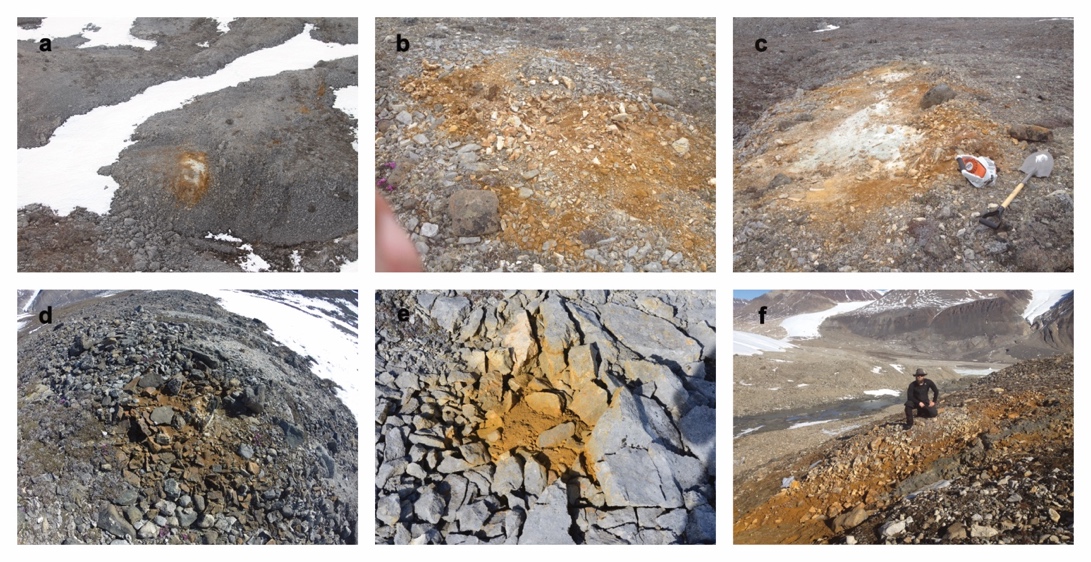


**Supplementary Figure SI.2.** Although only two of the alteration features were sampled for this study, six of these features have been identified at Borup Fiord Pass. Five of these features all occur within a small region while another, the North Feature from this study, occurs ~300 m to the north (yellow arrow in Fig. SI.1.b), very close to where the strike-slip fault crosses the valley. All six of the alteration features are shown here. The features in **c** and **f** were sampled for this study. The elliptical features are stained red by the presence of iron oxides, with two of the features (in **a** and **c**) showing white, gypsum-rich interior regions. Approximate diameters of the features in a-f are 5, 2, 3, 1, 0.5, and 3 m, respectively.


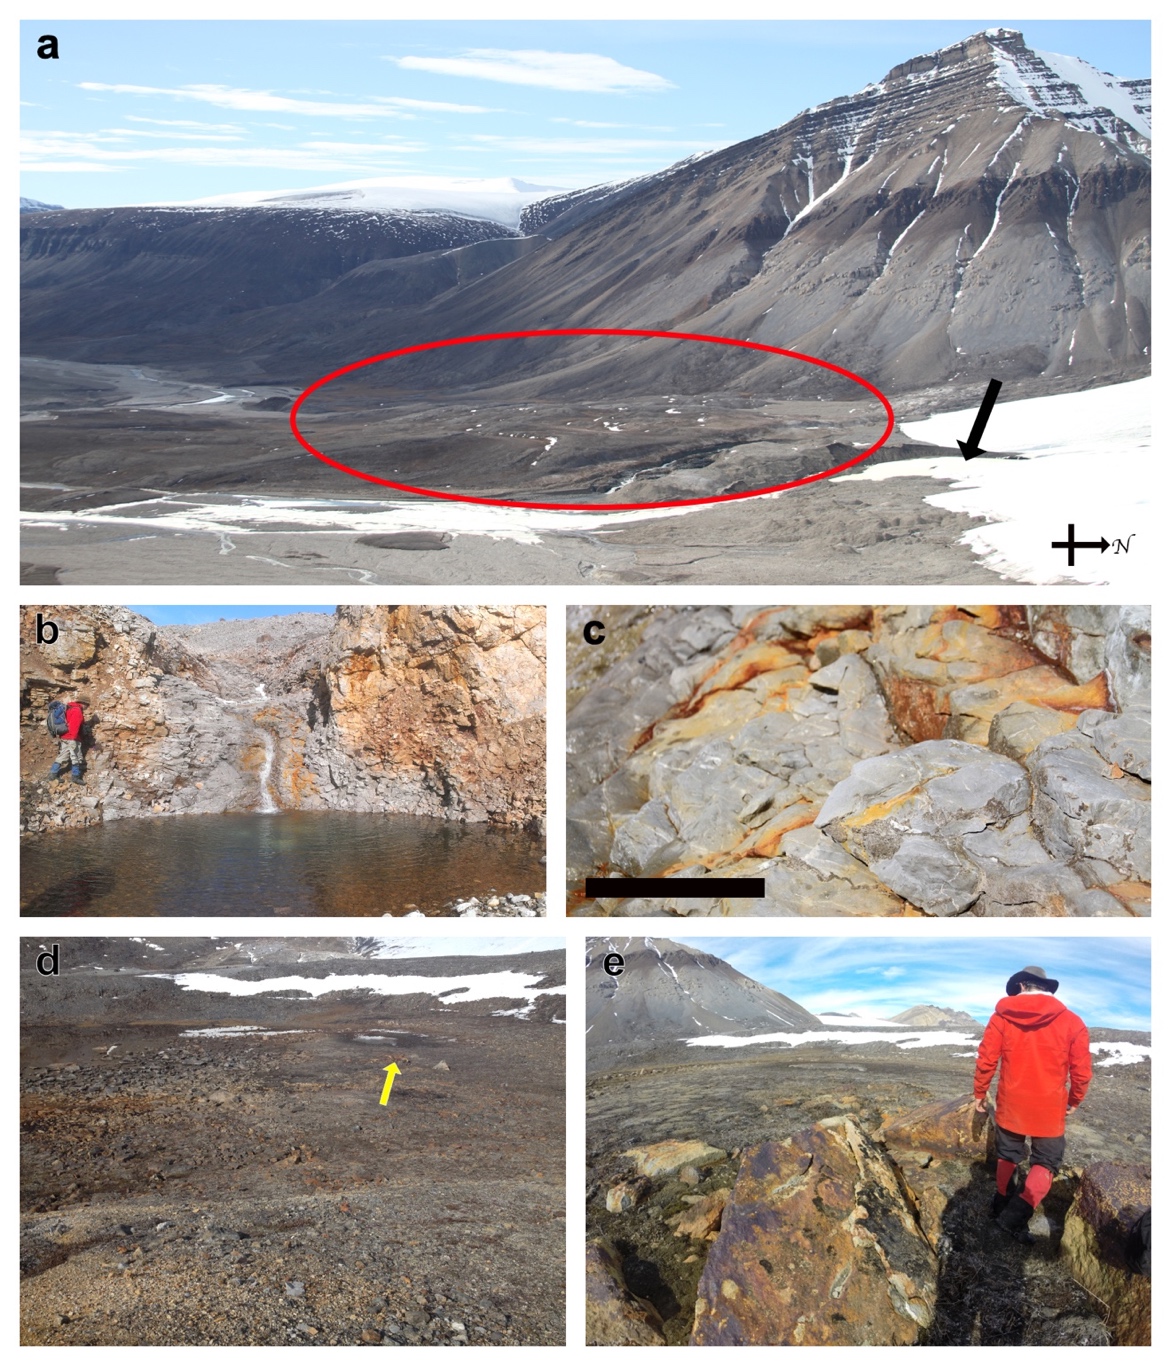


**Figure SI.3.** An image taken from the east side of the valley (**a**) shows the structure of the valley around the alteration feature region (circled in red; the hill is estimated to be 1 km in diameter). The black arrow points to the location of a sulfide-rich aufeis observed in 2014. The mouth of “Pyrite Canyon”, which opens to a small pool of water, is shown in **b** (human shown for scale), and **c** shows a close-up of rocks stained in red (and veined with pyrite, though not obvious at the scale of the image). The scale bar in **c** is estimated to be 30 cm. The lake which sits slightly below the alteration features on the hill is shown in **d**, with the yellow arrow indicating the location of the close-up shot of red-stained rocks shown in **e** (human for scale).

## Supplemental Data

### X-Ray Diffraction (XRD) Data

X-ray diffraction (XRD) data were processed in Jade 9 through first applying a background correction routine (the data were of high quality and backgrounds were minimal for all samples). Data were then visually shifted in 2θ to fit the maximum XRD lines of gypsum (a major component of all samples; JCPDS PDF #00-033-0311); shifts were no more than 1° 2θ (and often far less), but improved results of the search/match routine within Jade 9 for potential mineral components. Components were determined visually as well as through search/match fitting routines. Although the XRD data were not collected in a manner which allows quantitative determination of mineral component fractions, the relative composition of each sample was qualitatively determined through comparisons of peak heights (where it was assumed that the component giving the highest intensity peak is also likely the most abundant component). The figures that follow contain the XRD diffractograms for all of the samples from this work. Sulfur, abbreviated as “S”, indicates only the common alpha-cyclooctasulfur (α-S8) allotrope.





**Figure SI.5.** All of the XRD plots from the samples discussed in the paper are presented here. Higher resolution versions are available upon request.

### Raman Microspectroscopy Data

Raman microspectroscopy maps were processed using LabSpec. The Horiba ICS Correction (an intensity correction calculation based on the laser source and optics) was applied to all data before processing. Automatic baselining was applied to all data by using polynomial fits (3rd or 4th degree) and fitting over a minimum of 100 points. In some cases, depending on noise, 10-100 noise points were added during baselining. Classical least squares (CLS) fitting was used to fit spectral maps with detected components. Multivariate curve resolution (MCR) was used to search for potential components of maps, though those operations were not performed for all data. Unknown peaks in Raman spectra were searched using Know-It-All and the RRUFF database (see Lafuente, Downs, Yang, & Stone, 2015; also, http://rruff.info/). The following sections present further figures from Raman microspectroscopy of samples from the alteration features.

#### Raman Mapping and Spectra for Top Samples (T1 and T2)

Figure SI.6 shows light microscopy images of samples T1 and T2, showing the abundance of tabular gypsum crystals within the material as well as the relevant colorations of the material from the central region (whitish; T1) and the outer edge (stained red; T2).

Figures SI.7 and SI.8 highlight the observations of grains from sample T1 that were used to show associations of organic carbon with pyrite and elemental sulfur (S0) in Figure 4. Figure SI.7 highlights the detections of anatase, pyrite, S0, gypsum, and organic carbon in the pyrite grain that was presented in Figure 4.a,c. Figure SI.8, meanwhile, shows identification of pyrite, S0, gypsum, and organic carbon in the spectral data from the mapped region presented in Figure 4.b,d. Figure SI.9 shows a Raman spectral map and fitting for data collected within the region highlighted with the white arrow in Fig. SI.6.b. These data are highly noisy, but do show the presence of abundant goethite as well as anatase, quartz, gypsum, and potentially some organic carbon. The filament in this region was highly fluorescent to the laser and did not return interpretable data.


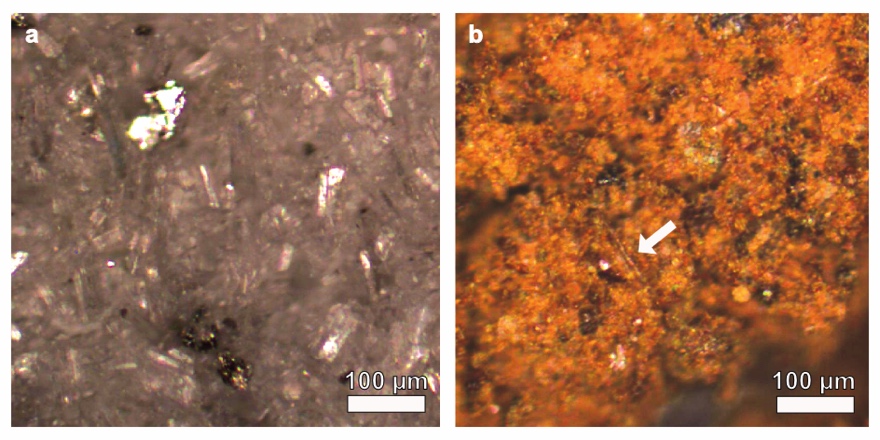


**Figure SI.6.** Sample T1, from the central surface region of the trench, primarily shows tabular crystals of gypsum (**a**) with grains of pyrite and smaller spots containing elemental sulfur (smaller dark ovoids in **a**). The reflected light image in **b** shows mostly red/orange goethite and gypsum in sample T2. A filament in this sample is highlighted with a white arrow (see Fig. SI.9).


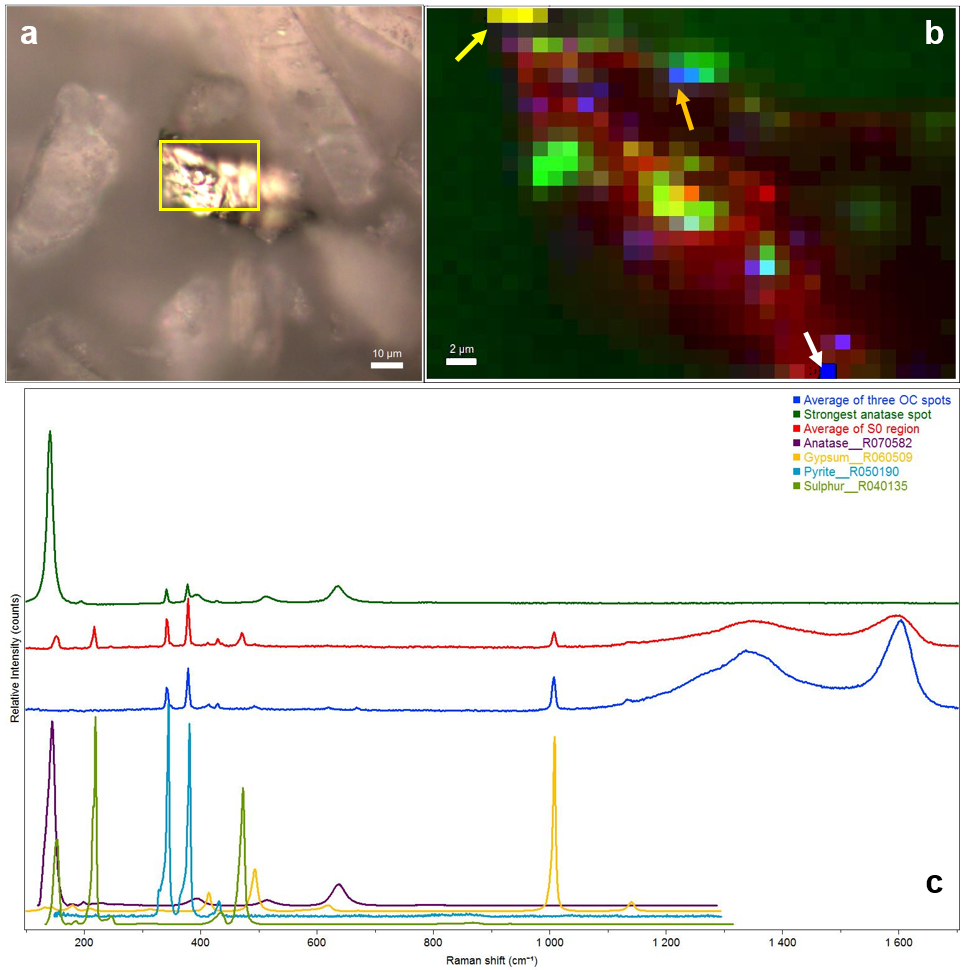


**Figure SI.7. Raman spectral mapping of the pyrite grain in Figure 4.a.** The pyrite grain is shown surrounded by tabular grains of gypsum in **a**. The yellow box in **a** shows the region of Raman spectral mapping, represented by the colorized Raman map in **b**. The map was collected with 1 μm steps and 3 iterations of 3 seconds each for data collection at each step. A 50x microscope objective was used and the 525 nm laser was reduced to 5% intensity to avoid burning of sample material. The spectral map shown in **b** is colorized for spectral fits as follows: red for pyrite (375-380 cm-1), green for gypsum (1000-1010 cm-1), and blue for the G-band of organic carbon (1500-1650 cm-1), yellow for S0 (210-220 cm-1) and one dark blue spot for anatase (110-160 cm-1). The arrows were included to highlight the spots containing the most S0 (yellow arrow) and organic carbon (orange arrow) as well as the spot of anatase (white arrow). The spectra in **d** show fits of RRUFF reference spectra to the best spectra for S0, anatase, and organic carbon in this region (shown as red, green, and blue spectra, respectively).


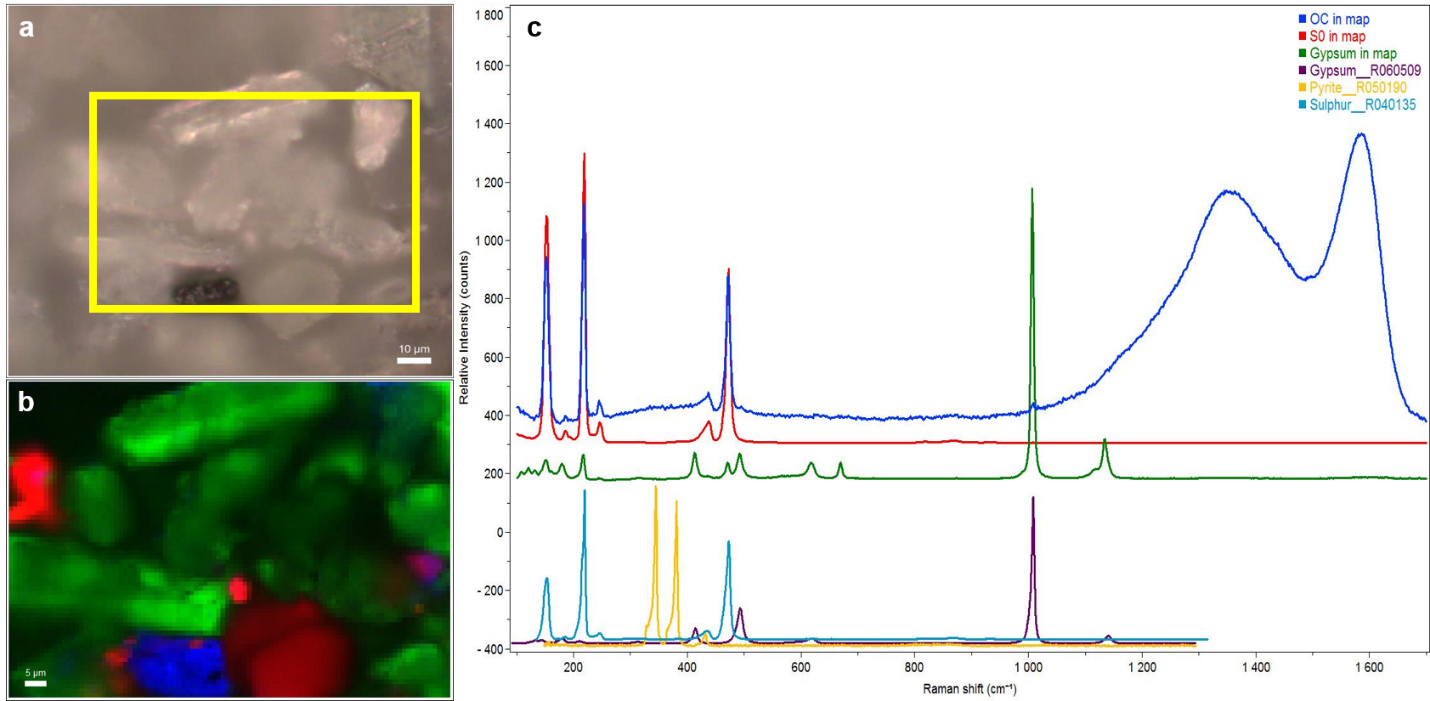


**Figure SI.8. Raman spectral mapping of the pyrite grain in Figure 4.b.** The dark circular region reported in Figure 4.b to contain organic carbon surrounded S0 is again shown in **a**, surrounded by tabular grains of gypsum and globular S0 (as shown in spectral map in **b**). The yellow box in **a** shows the location of the map in **b**. The map was collected with 1 μm steps and 2 iterations of 4 seconds each for data collection at each step. A 50x microscope objective was used and the 525 nm laser was reduced to 5% intensity to avoid burning of sample material. The spectral map shown in **b** is colorized for spectral fits as follows: red for S0 (205-225 cm-1), green for gypsum (1000-1020 cm-1), and blue for the G-band of organic carbon (1500-1650 cm-1). The Raman spectra shown in **c** are the best representative spectra from the map in **b** for S0, gypsum, and organic carbon (red, green, and blue spectra, respectively). Also shown are RRUFF reference spectra for pyrite, S0, and gypsum (no pyrite was detected in the map in **b**).


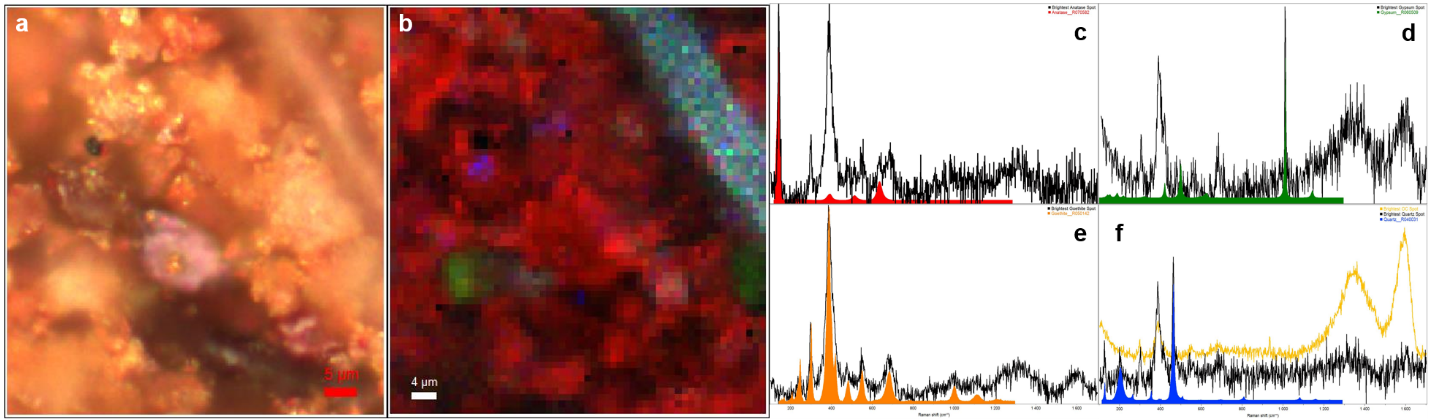

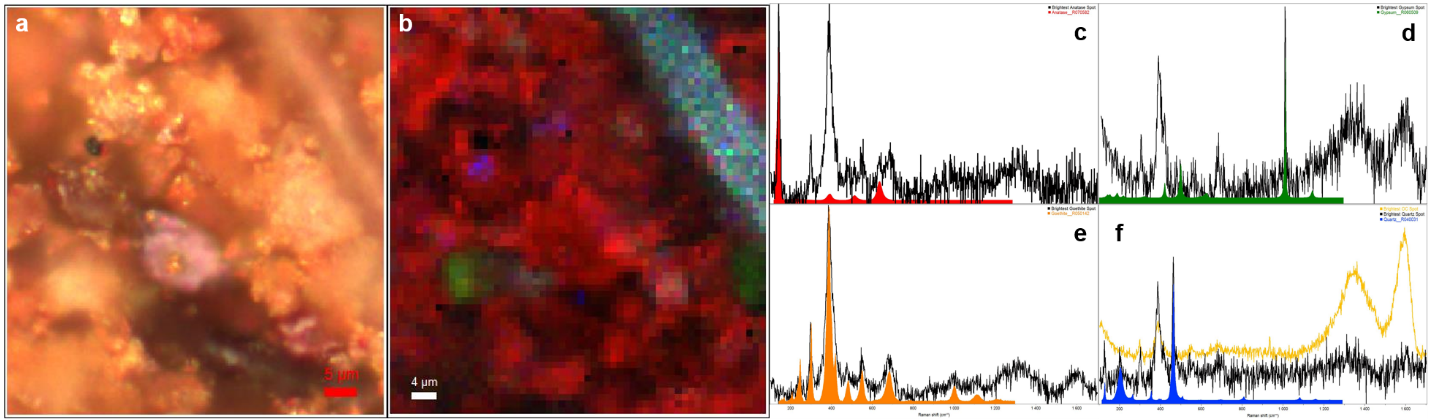


**Figure SI.9. Raman spectral mapping of the sample T2.**

The region of sample T2 with the filament (see Fig. SI.6.b) was mapped using Raman microspectroscopy (**a**,**b**). The map was collected with 1 μm steps and 3 iterations of 5 seconds each for data collection at each step. A 50x microscope objective was used and the 525 nm laser was reduced to 1% intensity to avoid burning of sample material (although sample materials rich in iron oxides tend to burn even at the lowest laser intensities). The spectral map shown in **b** is colorized for spectral fits as follows: red for goethite (360-400 cm-1), green for gypsum (1000-1020 cm-1), and blue for the G-band of organic carbon (1500-1650 cm-1). The Raman spectra in **c**-**f** are the best representative spectra from the map in **b** for fitting with anatase (shown in red in **c**), gypsum (shown in green in **d**), goethite (shown in orange in **e**, though present in all spectra from this mapped region), and quartz and organic carbon (blue and yellow in **f**, respectively). The data were very noisy and the potential detection of peaks fit with organic carbon is considered dubious.

#### Raman Mapping and Spectra for Sidewall Samples (S2 and S3)

Further Raman microscpectroscopy data are presented here for regions of samples S2 and S3. Figure SI.10 shows results of CLS fitting for a region of sample S2 (see Fig. 5). This region shows large pyrite grains (up to ~100 μm in width) surrounded by red-stained tabular grains of gypsum and round grains of goethite. Map fits for gypsum, goethite, and pyrite are shown throughout the region. Micron-sized spots of S0 as well as organic carbon are found associated with the large pyrite grain in this region. Fig. SI.11 shows an optical microscopy image of sample S3 as well as a spectral map of elemental sulfur, gypsum, and organic carbon in the sample. Figure SI.12 shows the results of CLS fitting for the Raman map shown in Fig. SI.11. Elemental sulfur appears to dominate the material in this mapped region. Grasby et al. (2012) had previously identified up to 15% S0 within the white material of the central surface region of one feature through XRD analyses, and our results show elemental sulfur to be present throughout the features. However, Raman microspectroscopy is far more sensitive to elemental sulfur than some other techniques (such as XRD), so we cannot here quantify the amount of S0.


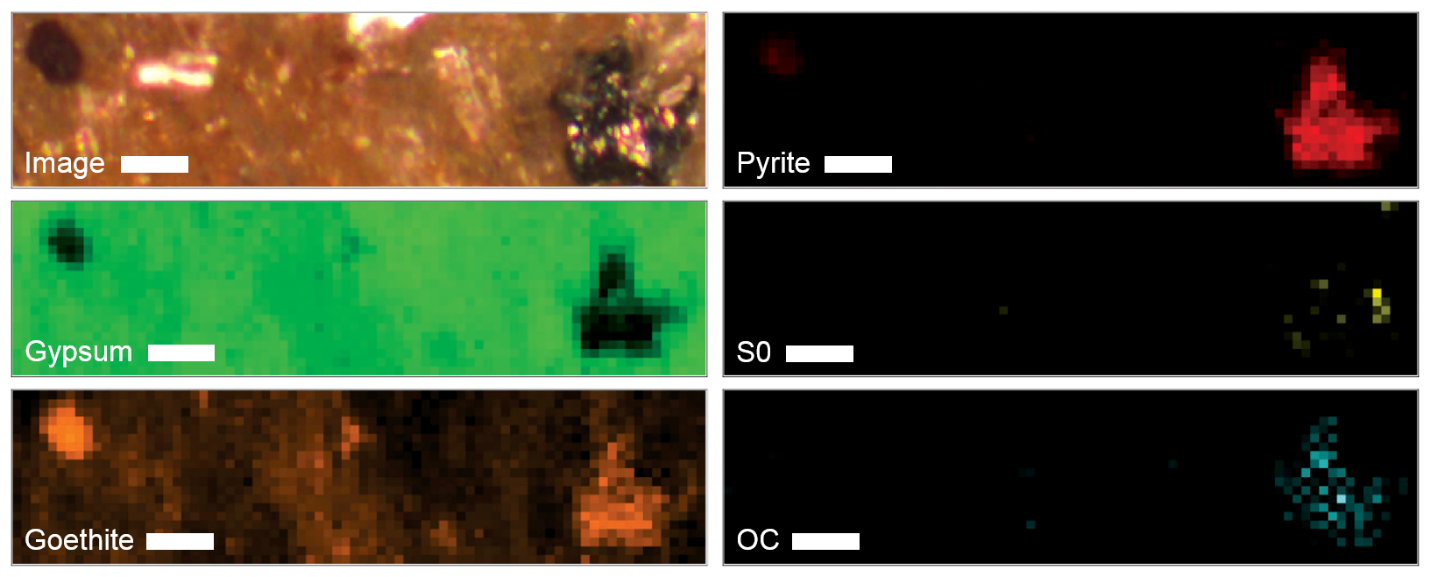


**Figure SI.10. CLS fitting of a Raman map for sample S2.** The region shown in the image (upper left) is a subset of the region presented in Figure 4.7. Raman map data were collected with 4 μm steps and 3 iterations of 5 seconds each for data collection at each step. A 10x microscope objective was used and the 525 nm laser was reduced to 5% intensity to avoid burning of sample material. Four of the images produced through CLS fitting were fit with RRUFF reference spectra: pyrite (R050190), S0 (R040135), goethite (R050142), gypsum (R060509). Organic carbon was fit using my own organic carbon spectra. Scale bars are 40 μm.


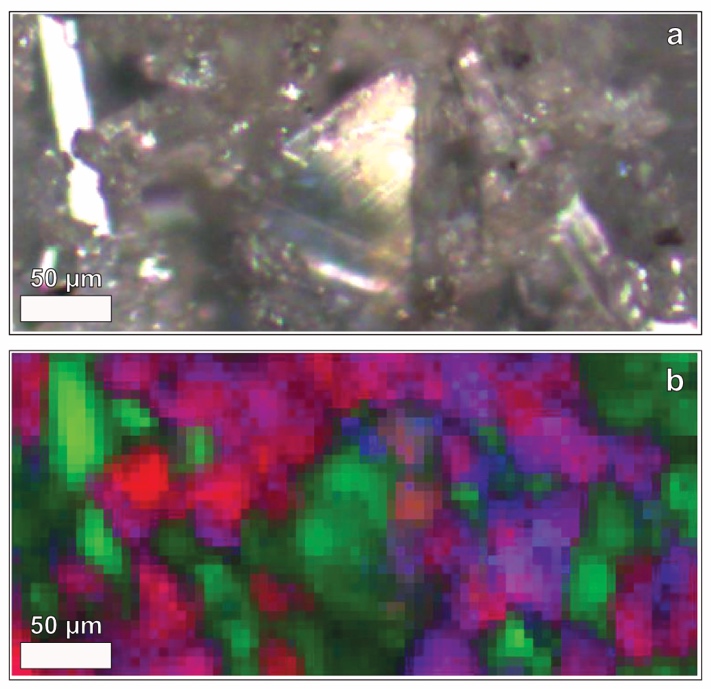


**Figure SI.11. Optical and Raman spectromicroscopy of sample S3.** A reflected light microscope image of sample S3 (**a**) shows tabular grains of gypsum surrounded by globules of elemental sulfur. The tri-colored Raman spectral map in **b** shows fits for elemental sulfur (red; fit to primary S0 peak from 210-225 cm-1), gypsum (green; fit to primary peak from 1000-1020 cm-1), and organic carbon (blue; fit to G-band of OC from 1500-1650 cm-1).


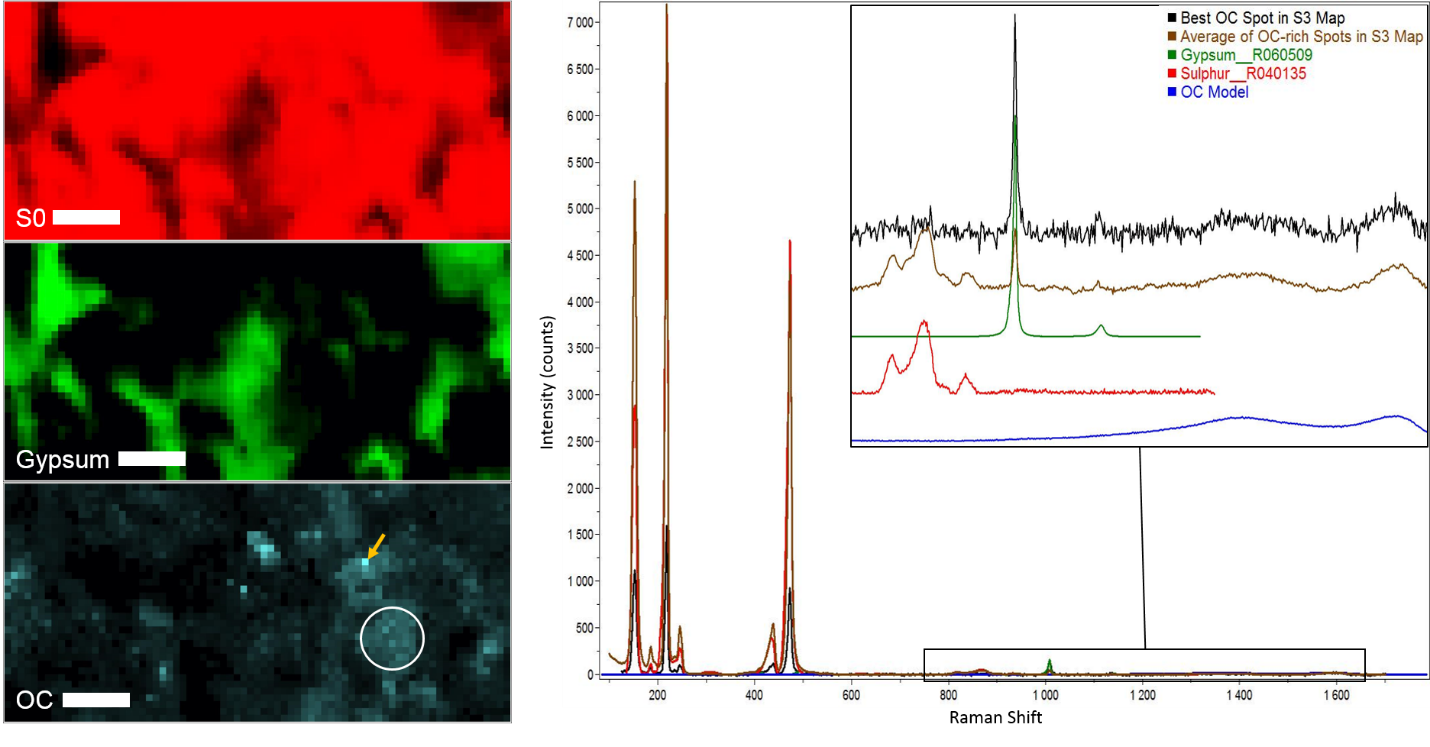


**Figure SI.12. CLS fitting of the Raman map for sample S3 shown in Fig. SI.11.** Only S0, gypsum, and organic carbon were detected in this mapped region. Raman map data were collected with 4 μm steps and 3 iterations of 5 seconds each for data collection at each step. Map data were fit with RRUFF reference spectra for S0 (R040135; red map), gypsum (R060509; green map), 12.34%), and a lab standard for organic carbon (teal map). Scale bars in the map images are 50 μm. Spectral data on the right show matches of the best spectra for organic carbon in this region. The orange arrow in the OC map is the location of the spectrum titled “Best OC Spot in S3 Map”, and the circle is a region where spectra were averaged (the averaged spectrum is titled “Average of OC-rich Spots in S3 Map”). Reference spectra for S0, gypsum, and organic carbon are also shown (in red, green, and blue, respectively).

#### Raman Mapping and Spectra for Core Samples (C1, C2, and C3)

This section presents further images and Raman microscpectroscopy data for regions of samples C1, C2, and C3. Figure SI.13 shows all of the spectral reference fits which were used to identify the components in pyrite-rich region of sample C1, as shown in Fig. 6.a,b. As the colorized map fitting images and associated colorized spectra show, Raman microspectroscopy identified the following components in this region of the sample: pyrite, gypsum, organic carbon, quartz, S0, anhydrite, hematite, and calcite. A region was also found which showed a fit for silicon. Silicon is almost never in pure metallic form in nature, so it’s assumed here that the finding of a silicon-rich region has two potential interpretations: 1) silicon wafers are sometimes used for samples that have been run through XRD before or after Raman microspectroscopy analysis. Although no silicon wafers were used for sample preparation for Raman microspectroscopy (samples were prepared on glass slides), it is possible that some silicon contamination from the instrument was introduced to the samples. However, as three spots (1 μm2 each) were fit with this silicon and the peak is well resolved, a second possibility is presented. 2) Although the spectral data from the map fit nearly identically with a reference spectrum of pure silicon and no silicate mineral spectra was identified within the RRUFF database or our own reference database, it is likely that these spectral data do indicate the presence of silicate minerals in the sample.

Figure SI.14 shows a microscope image of sample C2, where red and white grains of gypsum were detected. The red/orange coloration correlates to detections of iron (oxyhydr)oxides. Figure SI.15 also shows Raman data for sample C2 (from the region presented in Fig. 6.c,d. This map region showed the presence of pyrite, S0, gypsum, anhydrite, and organic carbon in core sample C2.

Figure SI.16 shows the Raman detection of organic carbon associated with gypsum and pyrite in sample C3. Figure SI.17 further explores the large grain in Fig. SI.16.b. This pyrite grain, which appears to potentially be an etched pyrite grain from microscope images (though resolution is not adequate for a definitive identification of etchings as are seen through SEM images in Fig. 8), is surrounded by tabular grains of gypsum and showed well-resolved organic carbon peaks. Furthermore, a small Raman map collected on this pyrite grain revealed the presence of anatase, gypsum, anhydrite, and pyrite (Fig. SI.18).

However, some pyrite spectra in this mapped region of the teal box in Fig. SI.17.b showed splitting of the pyrite Raman peaks (teal spectrum in Fig. SI.18). Figure SI.19 further explores this pyrite Raman peak splitting. Spectra were identified with peaks at lower energies (~336 and ~367 cm-1), peaks at higher energies (~342 and ~377 cm-1), or a mixture of both types of peaks. Furthermore, spectra with the lower energies for pyrite peaks also revealed the presence of Raman bands for mackinawite, a tetragonal iron/nickel sulfide mineral that can bear sulfide in a divalent (2-) chemical oxidation state. It is not yet known, though, if the presence of mackinawite is also the reason for the lower energy positions of Raman bands in this material.


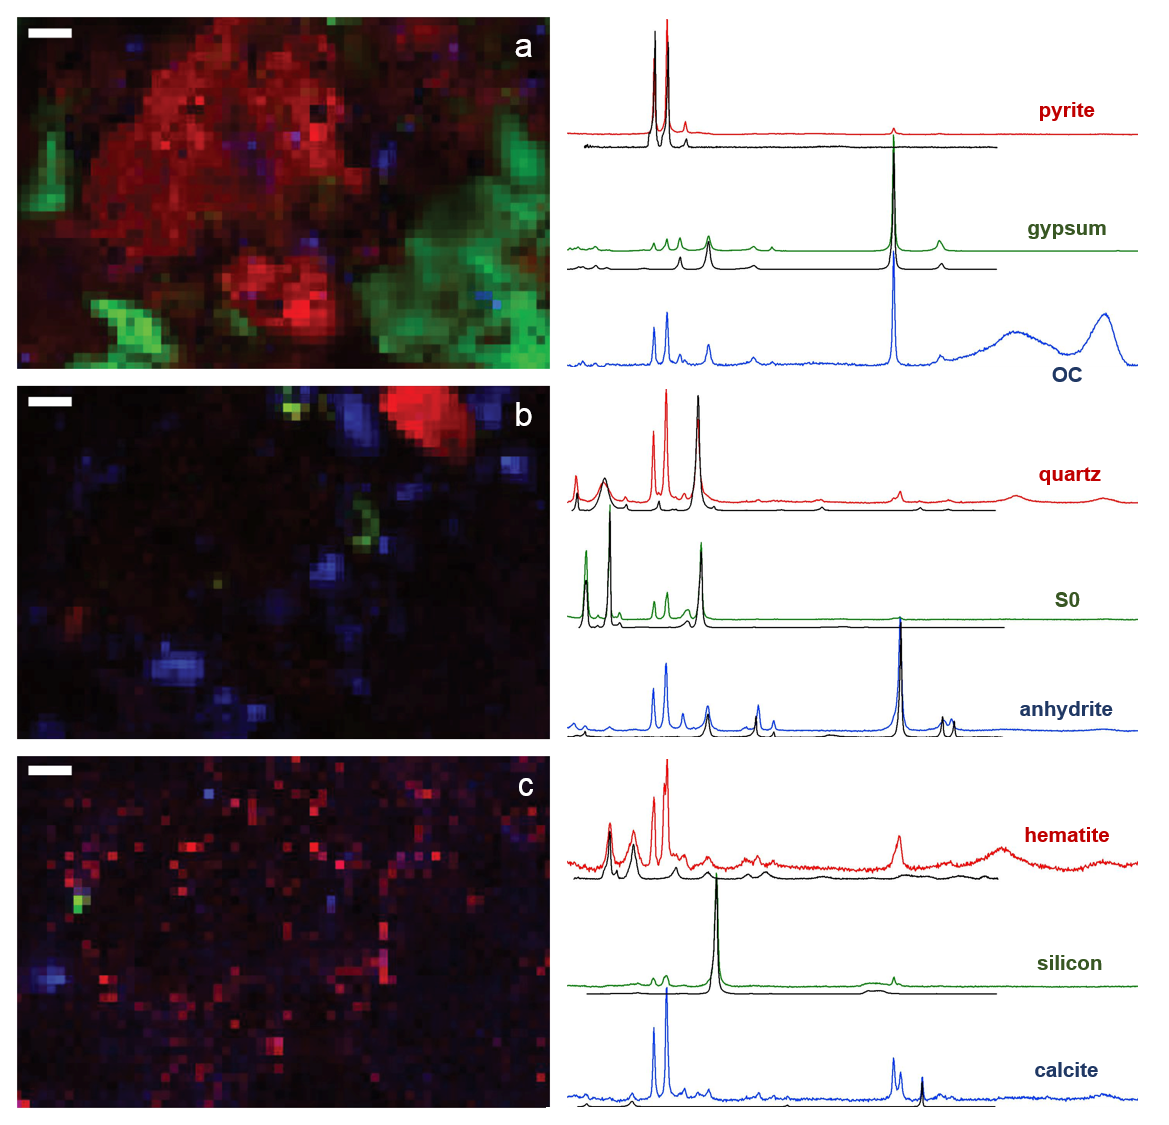


**Figure SI.13. Raman spectral maps and fits for components in the region shown in Fig. 6.a,b.** Three RGB colorized maps are shown. In each case, reference spectra (presented in black) are shown along with the best spectral data for each component from the map (components are colorized to match the RGB maps). Scale bars are 10 μm.


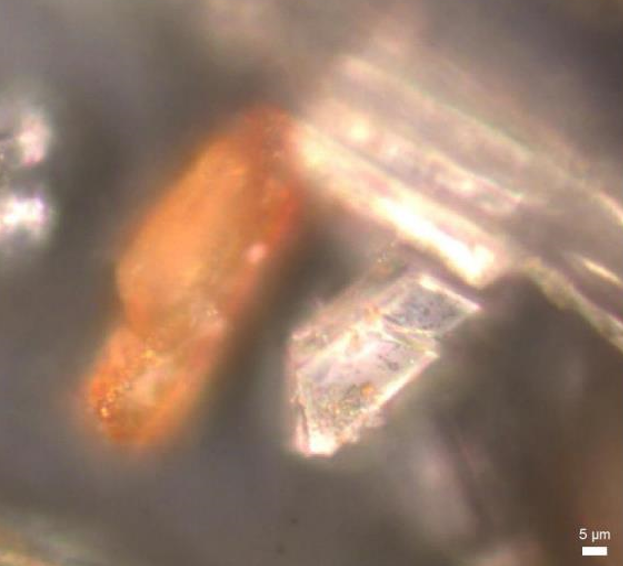


**Figure SI.14. Tabular grains of gypsum in sample C2.** This microscope image shows two tabular grains of gypsum in sample C2. One of these grains (on the left) is stained in red due to the presence of iron (oxyhydr)oxides. Although data are not shown here, mapping of small regions on each of these grains revealed gypsum, anhydrite, anatase and iron (oxyhydr)oxides on/in the red-stained grain, while gypsum, anhydrite, S0, iron (oxyhydr)oxides, and organic carbon are on/in the white grain on the right in this image.


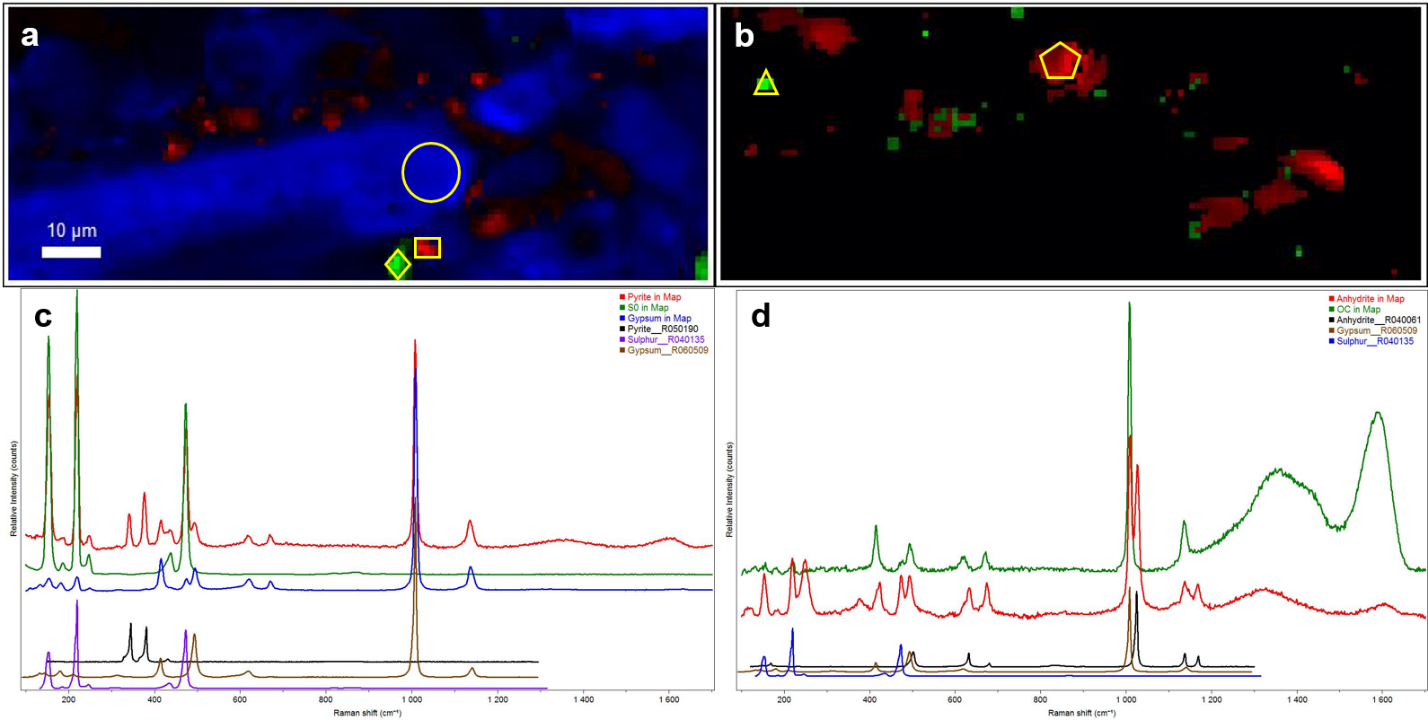


**Figure SI.15. Raman maps and spectra for sample C2 region shown in Fig. 6.c,d.** The Raman map of this region is colorized for spectral fits in **a** and **b**. The Raman map was collected using 1 μm steps with 3 iterations of 2 seconds of data collection per step. A 50x microscope objective was used with the 525 nm laser reduced to 5% intensity. The colorized map in **a** shows fits for pyrite (red; fit to 365-375 cm-1), S0 (green; fit to 205-225 cm-1), and gypsum (blue; fit to 1000-1020 cm-1). The spectra in **c** for map data are colorized to match these components, with the specific spectral data coming from the regions shown in the circle, box, and diamond in **a**. Reference spectra are shown for pyrite, S0, and gypsum. The colorized map shown in **b** reveals map fits for anhydrite (red; fit to 1025-1030 cm-1) and the G-band of organic carbon (green; fit to 1500-1650 cm-1). The spectra in **d** for map data are colorized to match these components, with the specific spectral data coming from the regions shown in the pentagon and triangle in **b**. Reference spectra are shown for S0, gypsum, and anhydrite. Although not plotted here, the anhydrite spectrum in **d** from the pentagon region shown in **b** also appears to contain disordered (or laser damaged) hematite (the spectrum is very similar to an RRUFF database spectrum for burnt umber).


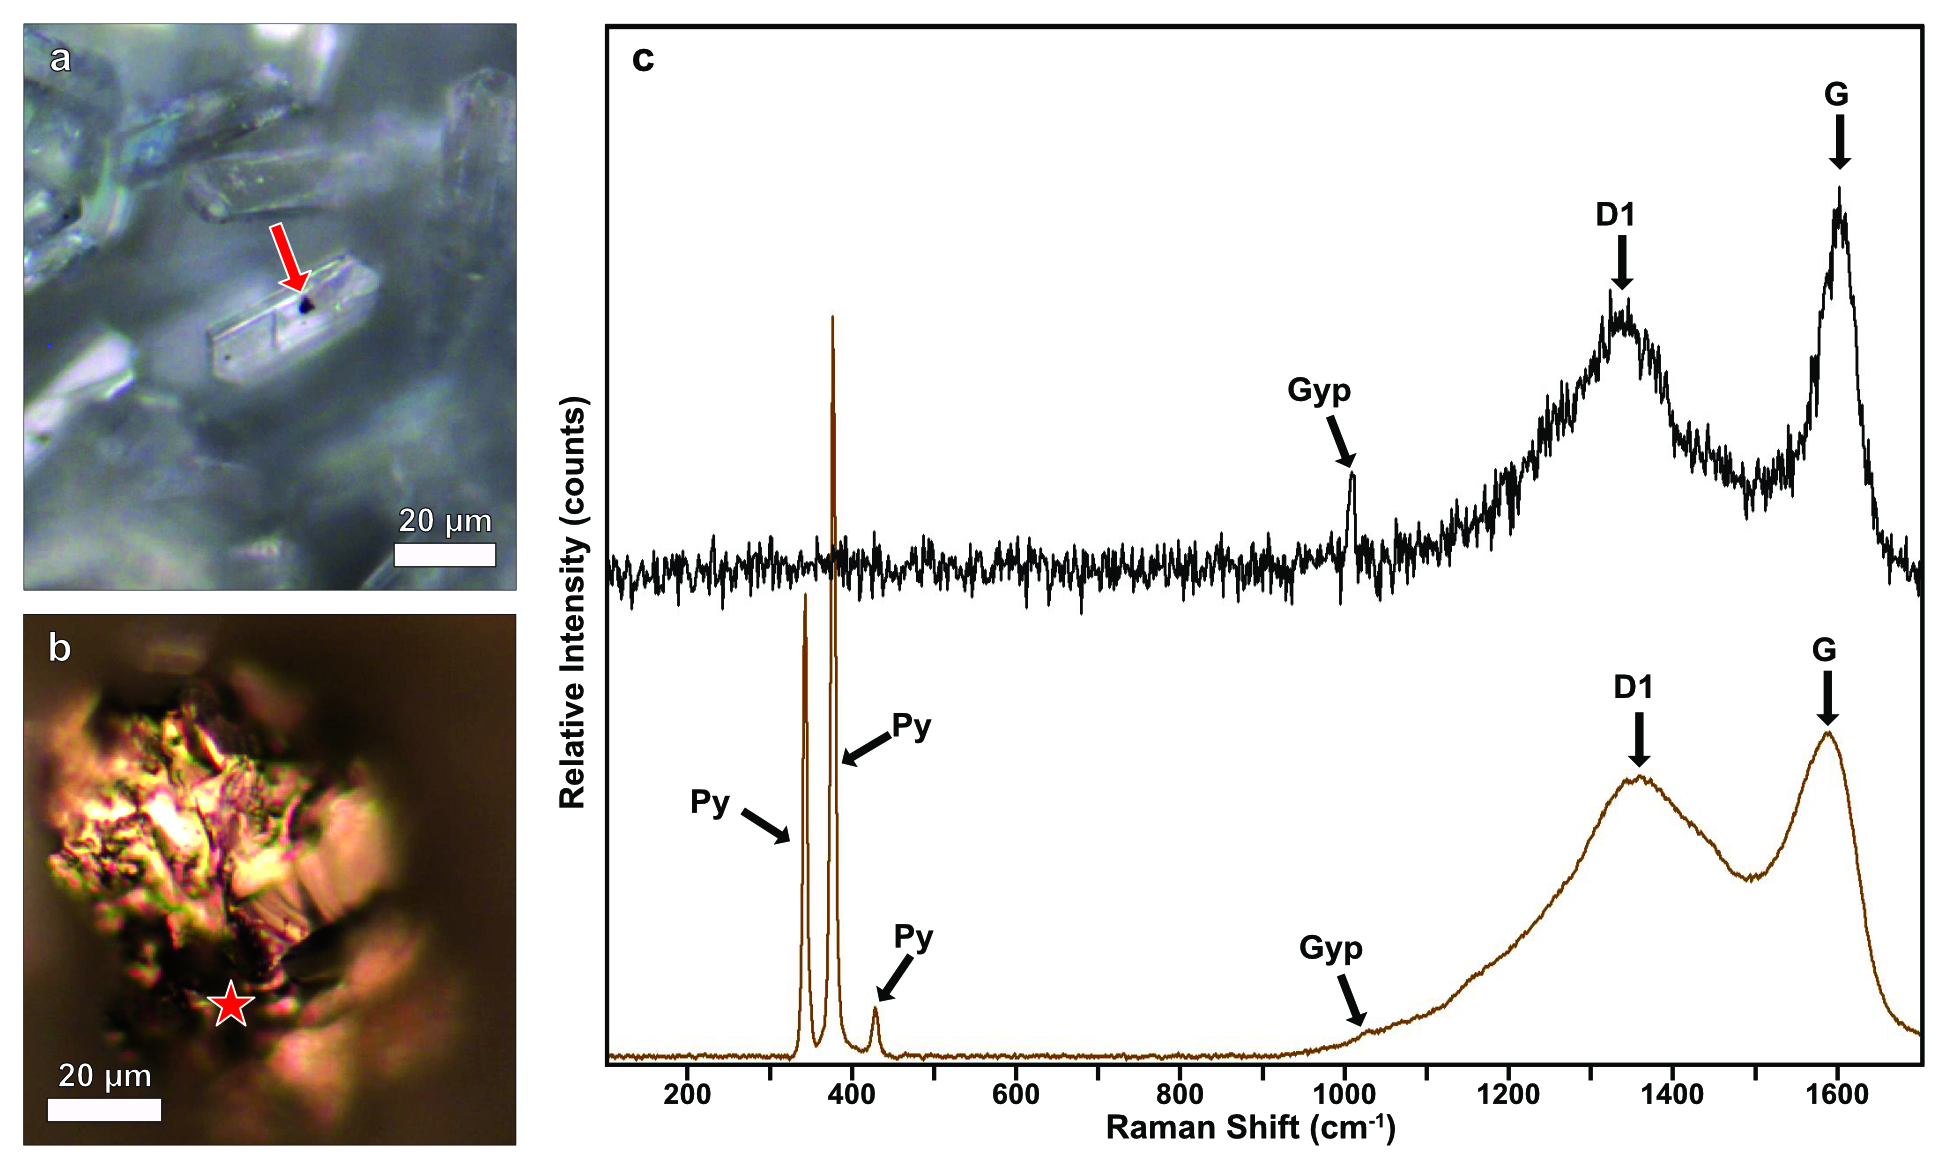


**Figure SI.16. Grains and organic carbon in sample C3.** Organic carbon was detected in a dark granule on/in a tabular gypsum crystal (**a**) as well as on a pyrite grain (**b**) in sample C3. Spectra for organic carbon are shown in (**c**). The spectrum from the dark grain in (**a**) was collected from one spot with 3 iterations at 3 seconds each. The spectrum from the pyrite grain in (**b**) (taken from the region shown in green) is an average of 6 spots with 4 iterations of 4 seconds each. The D1- and G-bands in (**c**) derive from peak fitting of the spectra. Peaks for gypsum (Gyp; 1008-1010 cm-1) and for pyrite (Pyr; 342, 377, & 429 cm-1) are also labeled.


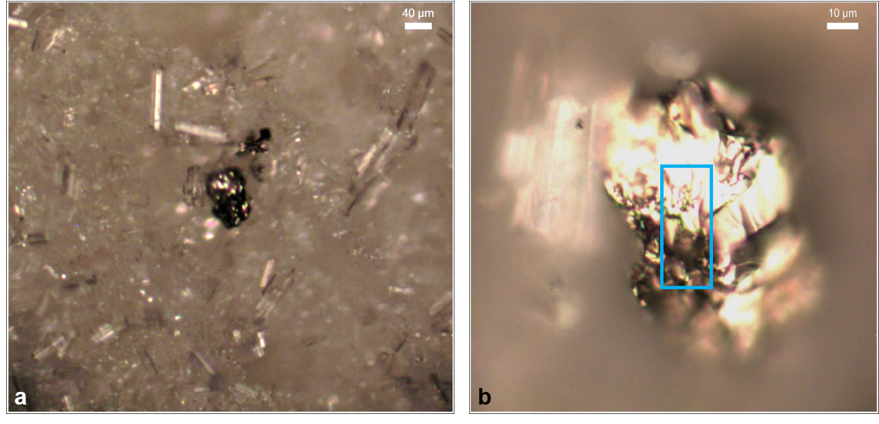


**Figure SI.17. A large pyrite grain in sample C3.** One sulfide grain within the matrix of tabular gypsum crystals (**a**,**b**) was mapped using Raman microscpectroscopy over a small region of the grain (~16x36 μm2; teal colored box in **b**). The map was collected using steps of 1 μm with 4 iterations of 4 seconds per spot. A 50x microscope objective was used to focus the 525 nm laser.


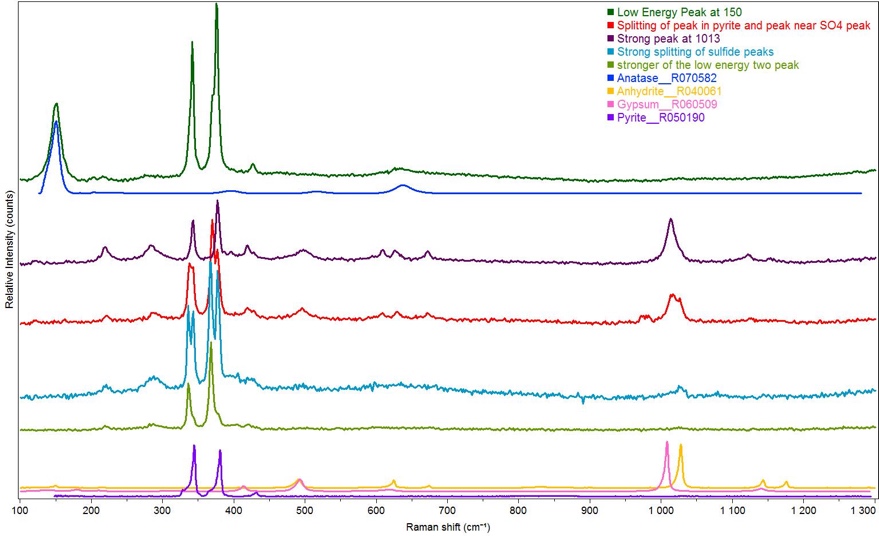


**Figure SI.18. Raman spectra from the map region shown in Fig. SI.17.** The primary components of the map collected in the teal box shown in Fig. SI.17 are anatase, gypsum, anhydrite, and pyrite (see fits with reference data above). The teal spectrum labeled “Strong splitting of sulfide peaks” was intriguing and led to further analyses that are shown in Figure SI.19.


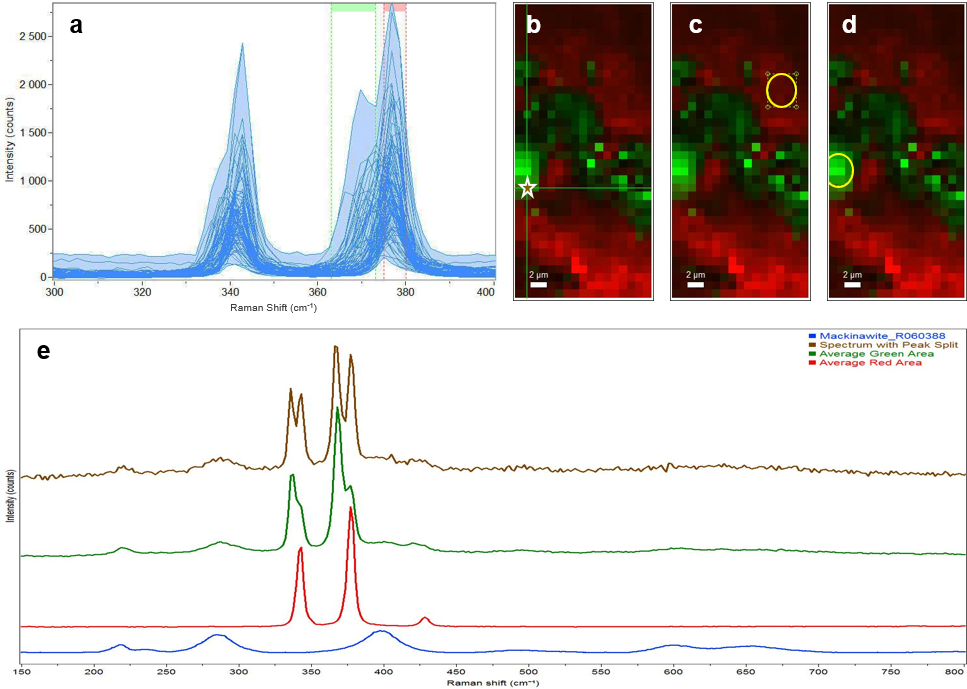


**Figure SI.19. Splitting of pyrite Raman bands in sample C3 and the presence of mackinawite.** The splitting of pyrite peaks as observed in the teal spectrum in Fig. SI.18 led to a refined map fitting using energy bands within the split peaks’ regions (**a**). The maps shown in **b-d** were created by mapping to energies shown in green and red regions in the spectra in **a** (and match the same area as the teal box in Fig. SI.17.b). Maps in **b**-**d** are colorized to fit these regions, where green is the lower-energy pyrite peak and red is the higher energy pyrite peak (**a**). Spectra in **e** were collected from maps **b**-**d**, where the brown and white star in **b** is the location of collection of the brown spectrum in **e**, the yellow circle in **c** is the location of collection of the red spectrum in **e**, and the yellow circle in **d** is the location of collection of the green spectrum in **e**. As is also shown in **e**, pyrite spectra with the lower-energy peaks also fit with Raman band positions of a reference spectrum of mackinawite.

#### Organic Carbon Analyses from Raman Microspectroscopy

The figures in this section (Figs. SI.20-23) show the fits of mixed Gaussian/Lorentzian functions and peak locations for organic carbon in samples T1, S1, C3, and FF2.

Figure SI.20 shows the fitting used for sample T1 organic carbon presented in Figure 4. Figure SI.21 shows a microscope image of a small region of organic carbon-rich grains arranged in a line on top of a gypsum grain in sample S1. This line, called “the dagger”, was mapped using Raman microspectroscopy, revealing S0, gypsum, and organic carbon. The analysis of the organic carbon in “the dagger” is shown in Figure SI.21.c. Figure SI.22 shows the fitting used for sample C3 organic carbon presented in the 2 spectra in Figure SI.16. Meanwhile, Figure SI.23 shows the fitting used for the large glom of organic carbon (~200 μm2) in sample NF2 as shown in Figure 7.d-f.

The results for all of these fits for organic carbon peaks are presented in Tables SI.1 and SI.2.


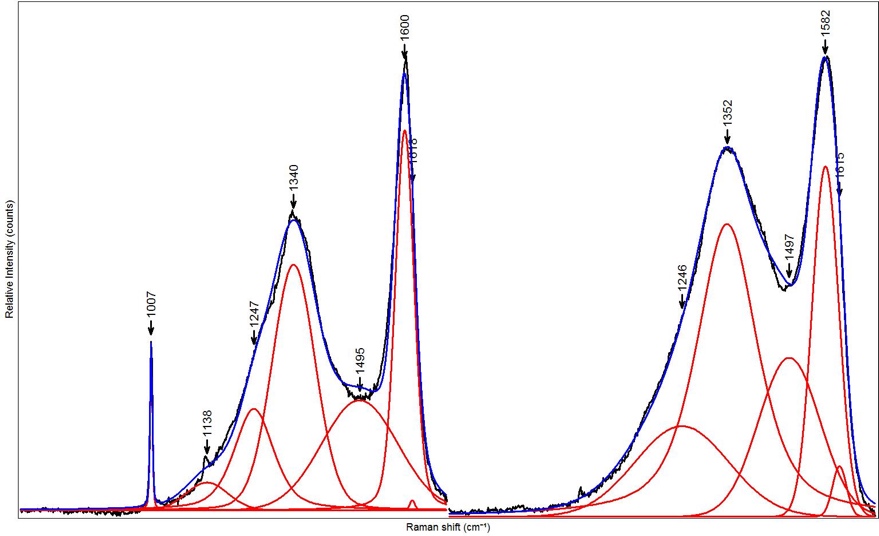


**Figure SI.20. Fitting of carbon in sample T1 in Fig. 4.f (left) and Fig. 4.e (right).**


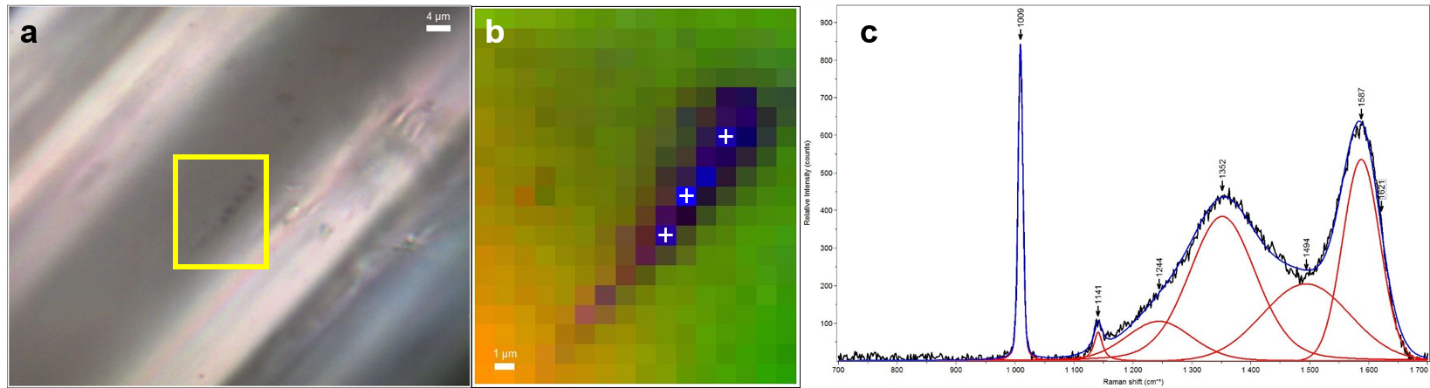


**Figure SI.21. “The Dagger” in sample S1 and fitting of organic carbon.** A region revealing a linear arrangement of dark particles called “the dagger”, on top of a grain of gypsum, is shown in **a**. Raman microspectroscopy was used to map the region in the yellow box in **a**, using 1 μm steps and 2 iterations of 1 second per step. The 525 nm laser was reduced to 5% intensity to avoid laser damage of the sample. An organic carbon spectrum was created from the average of the spectra within the three white crosses shown in **b**. The fitting of mixed Gaussian/Lorentzian function for analyses of the D- and G-bands of this organic carbon spectrum is presented in **c**.


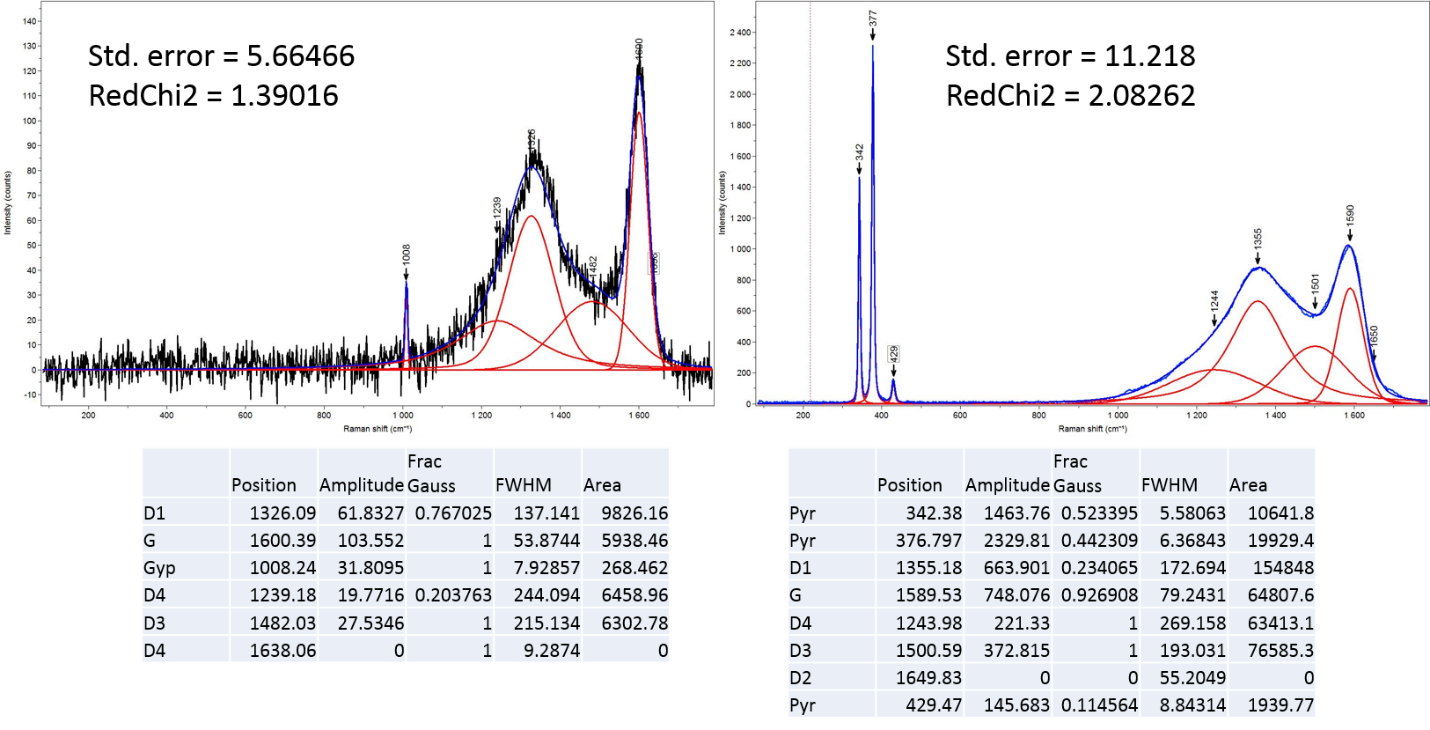


**Figure SI.22. Fitting of organic carbon in sample C3 spectra from Fig. SI.16.** The spectrum on the left is the same as is presented at the top of Fig. SI.16.c, while the spectrum on the right is the same as the one presented at the bottom of Fig. SI.16.c.


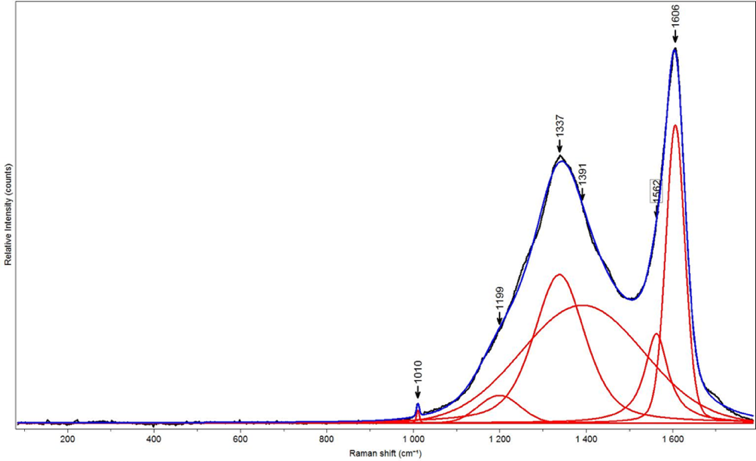


**Figure SI.23. Fitting of organic carbon from NF2.** The glom of organic carbon shown in Figure 7.d-f is shown here with applied Guassian/Lorentzian functions for fitting of the D- and G-bands of organic carbon.

**Table SI.2. Organic Carbon Peak Fitting from Raman Microspectroscopy.** Data for several samples that were analyzed by using peak fitting routines in LabSpec6 are presented. Organic carbon peaks were fit using assumed locations of the D1, D2, D3, D4, and G bands and then allowing the program to determine the best-fit. Displayed are the locations of the D1 and G bands (in Raman shift; cm-1), the R1 and R2 ratios (where R1=(D1/G)I and R2=(D1/(D1+D2+G))A), as well as the standard error (%) and reduced chi-square values as determined from the fitting routine.

| **Sample** | **D1 Band**  **(cm-1)** | **G Band**  **(cm-1)** | **R1** | **R2** | **Std. Error (%)** | **Reduced Χ2** |
| --- | --- | --- | --- | --- | --- | --- |
| T1 - Grain 3 (see Fig. 11a,c) | 1349 | 1594 | 0.6 | 0.5 | 4.7 | 2.4 |
| T1 - Grain 5 (see Fig. 11b,d) | 1347 | 1576 | 1.0 | 0.6 | 7.1 | 2.1 |
| T2 - Grain 1 | 1359 | 1592 | 0.8 | 0.7 | 8.3 | 2.7 |
| S1 - “Dagger” (see Fig. A28c) | 1352 | 1587 | 0.7 | 0.6 | 13.6 | 2.1 |
| S2 - Pyrite in Map | 1377 | 1574 | 0.8 | 0.6 | 1.8 | 1.1 |
| S3 - Best OC Spot | 1366 | 1589 | 0.5 | 0.5 | 3.0 | 3.4 |
| S3 - Average of OC Data | 1360 | 1593 | 0.7 | 0.6 | 1.7 | 2.3 |
| C1 - OC from Map | 1339 | 1583 | 0.6 | 0.5 | 3.7 | 1.6 |
| C2 - Pentagon Region OC | 1345 | 1575 | 0.5 | 0.4 | 3.3 | 1.3 |
| C3 - Dark Grain | 1326 | 1600 | 0.6 | 0.6 | 5.7 | 1.4 |
| C3 - Grain 3 Pyrite | 1355 | 1590 | 0.9 | 0.7 | 11.2 | 2.1 |
| C4 - OC from Map | 1375 | 1591 | 0.7 | 0.7 | 1.6 | 1.2 |
| FF1 - Dark Grain | 1366 | 1574 | 0.8 | 0.5 | 55.5 | 3.9 |
| FF1 - Dark Awesome OC | 1365 | 1596 | 0.8 | 0.6 | 9.1 | 2.8 |
| FF1 - Best OC from Map | 1338 | 1589 | 1.0 | 0.7 | 1.7 | 1.6 |
| FF2 - Dark Grain | 1349 | 1602 | 0.5 | 0.6 | 9.8 | 2.0 |
| FF2 - OC Gunk | 1341 | 1590 | 0.7 | 0.5 | 3.3 | 11.2 |
| ff3 – Wide-8 Map | 1349 | 1602 | 0.7 | 0.7 | 6.1 | 3.6 |
|  |  |  |  |  |  |  |
| **Min.** | **1326** | **1574** | **0.5** | **0.4** | **1.6** | **1.1** |
| **Max.** | **1377** | **1602** | **1.0** | **0.7** | **55.5** | **11.2** |
| **Range** | **51** | **29** | **0.5** | **0.3** | **53.9** | **10.1** |
| **Average** | **1353** | **1589** | **0.7** | **0.6** | **8.4** | **2.7** |

**Table SI.3. Organic Carbon Peak Fitting from Raman Microspectroscopy, Part II.** Similar to Table SI.2, data for organic carbon peak fitting are presented. Included here are D1-G band separation values and FWHM measurements for the D1 and G bands. All values are expressed in Raman shift of cm-1.

| **Sample** | **D1 Band** | **G Band** | **G-D1 Band Separation** | **D1 FWHM** | **G FWHM** |
| --- | --- | --- | --- | --- | --- |
| T1 - Grain 3 (see Fig. 11a,c) | 1349 | 1594 | 245.3 | 115.9 | 54.3 |
| T1 - Grain 5 (see Fig. 11b,d) | 1347 | 1576 | 229.1 | 160.7 | 75.5 |
| T2 - Grain 1 | 1359 | 1592 | 233.0 | 203.7 | 73.7 |
| S1 - “Dagger” (see Fig. A28c) | 1352 | 1587 | 235.7 | 134.1 | 74.4 |
| S2 - Pyrite in Map | 1377 | 1574 | 196.3 | 181.7 | 86.4 |
| S3 - Best OC Spot | 1366 | 1589 | 223.4 | 135.9 | 64.3 |
| S3 - Average of OC Data | 1360 | 1593 | 233.1 | 128.5 | 61.7 |
| C1 - OC from Map | 1339 | 1583 | 244.7 | 124.1 | 68.2 |
| C2 - Pentagon Region OC | 1345 | 1575 | 230.0 | 109.8 | 74.2 |
| C3 - Dark Grain | 1326 | 1600 | 274.3 | 137.1 | 53.9 |
| C3 - Grain 3 Pyrite | 1355 | 1590 | 234.4 | 172.7 | 79.2 |
| C4 - OC from Map | 1375 | 1591 | 216.3 | 261.9 | 67.9 |
| FF1 - Dark Grain | 1366 | 1574 | 207.3 | 134.6 | 81.3 |
| FF1 - Dark Awesome OC | 1365 | 1596 | 231.1 | 139.9 | 65.9 |
| FF1 - Best OC from Map | 1338 | 1589 | 251.7 | 141.2 | 61.9 |
| FF2 - Dark Grain | 1349 | 1602 | 252.5 | 120.2 | 45.9 |
| FF2 - OC Gunk | 1341 | 1590 | 248.3 | 114.6 | 61.5 |
| ff3 – Wide-8 Map | 1349 | 1602 | 253.7 | 181.7 | 56.9 |
|  |  |  |  |  |  |
| **Min.** | **1326** | **1574** | **196.3** | **109.8** | **45.9** |
| **Max.** | **1377** | **1602** | **274.3** | **261.9** | **86.4** |
| **Range** | **51** | **29** | **78.0** | **152.1** | **40.5** |
| **Average** | **1353** | **1589** | **235.6** | **149.9** | **67.1** |

### Microscopy of filaments


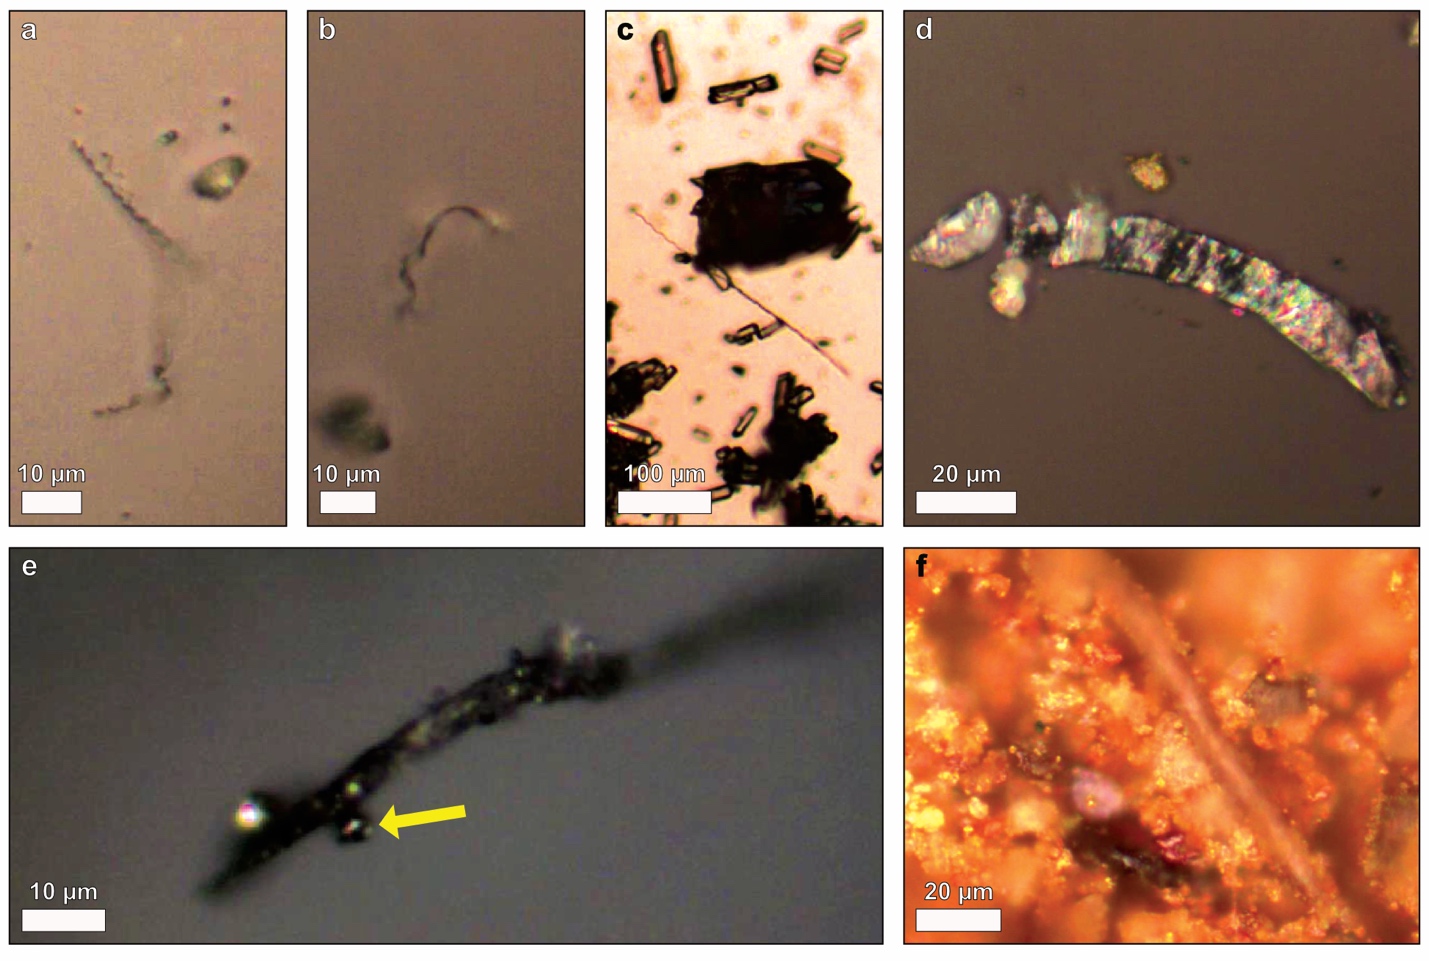


**Figure SI.24. Reflected light microscopy of filamentous materials.** Sample C2 contains a number of filamentous structures (**a**-**d**). No adequate spectra were produced for the thin spiral filaments in **a**-**c**, while the thicker filamentous structure in **d** appeared to be composed of gypsum. A filamentous structure in sample C4 (**e**) was highly fluorescent but appears to contain organic carbon while small spheroids attached to it (e.g., yellow arrow in **e**) are composed of pyrite. The image in **f** shows the filament in sample T2 marked with the white arrow in Figure 5b. This structure was also fluorescent while producing peaks for organic carbon. A Raman map of the region shown in **f** showed goethite, quartz, and organic carbon through the material as well (Fig. SI.18).
